# Supplementary material for: Characterization of genes in the ASYMMETRIC LEAVES2/LATERAL ORGAN BOUNDARIES (AS2/LOB) family in Arabidopsis thaliana, and functional and molecular comparisons between AS2 and other family members
Source: PubMed Central journal article supplement (PMC2721968; doi:10.1111/j.1365-313x.2009.03797.x), 2009-03-02

Relative level of expression ( $\log_{10}$ )

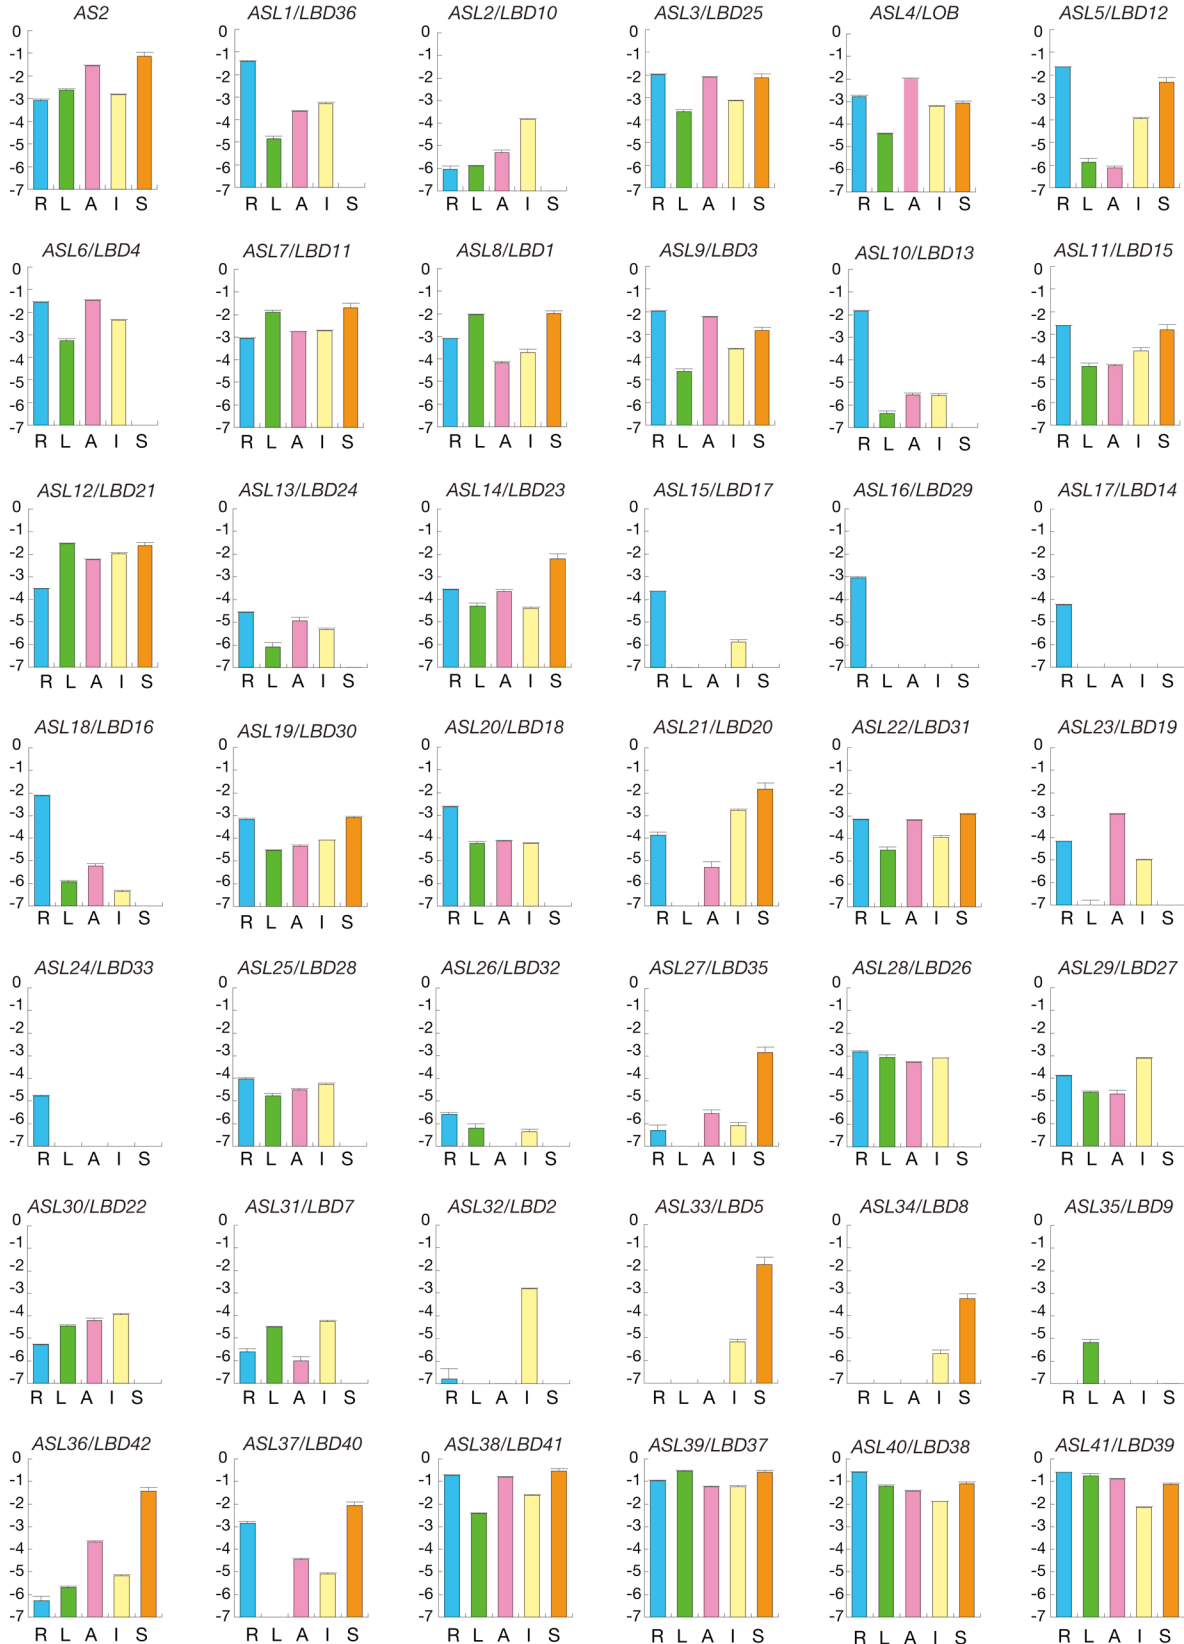

Supplement: tpj0058-0525-SD1.pdf [file tpj0058-0525-SD1.pdf]
